# Supplementary material for: Emerging investigator series: phosphorus recovery from municipal wastewater by adsorption on steelmaking slag preceding forward osmosis: an integrated process
Source: Royal Society of Chemistry journal article supplement (doi:10.1039/d0ew00187b), 2020-01-01
Supplement: d0ew00187b1.pdf [file d0ew00187b1.pdf]

### Supplementary Information

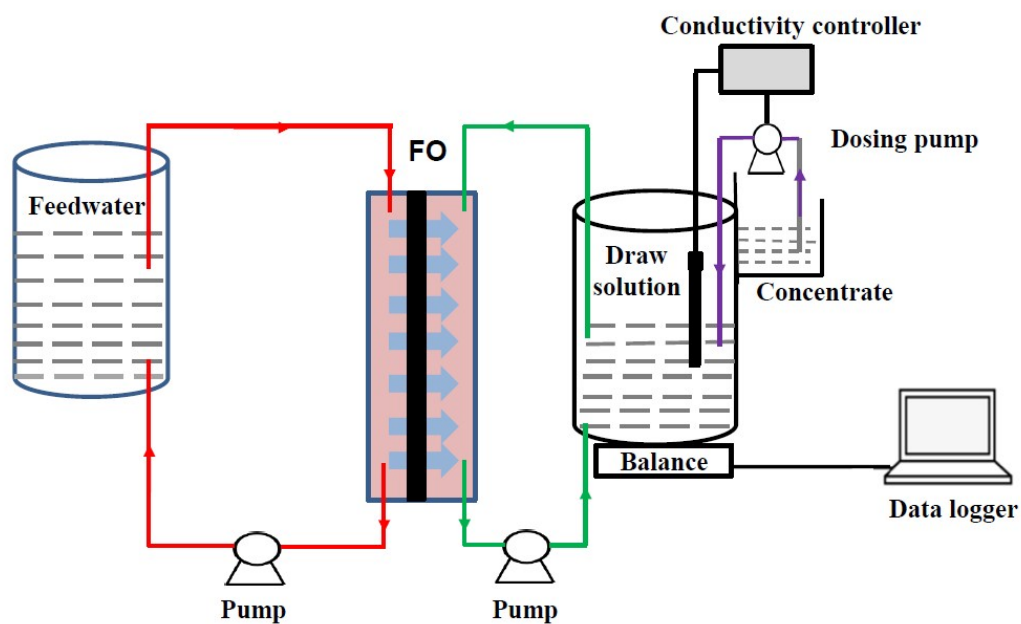

**Figure S1:** A schematic diagram of the lab-scale FO system

**Table S1:** Properties of the TFC membrane (Zheng et al., 2018)

| <b>Properties</b>                                         | <b>Value</b>    |
|-----------------------------------------------------------|-----------------|
| Pore radius (nm)                                          | $0.37 \pm 0.04$ |
| Water permeability coefficient (L/m <sup>2</sup> h.bar)   | $3.2 \pm 0.22$  |
| Salt (NaCl) permeability coefficient (L/m <sup>2</sup> h) | $0.41 \pm 0.01$ |
| Membrane structure parameter (mm)                         | $0.46 \pm 0.05$ |
| Zeta potential (mV)                                       | -16.2           |
| Contact angle (active layer) (°)                          | $49.5 \pm 3.4$  |

Zheng, L., Price, W.E., Nghiem, L.D. 2018. Effects of fouling on separation performance by forward osmosis: the role of specific organic foulants. *Environmental Science and Pollution Research*, 1-12.

*Table S2: Concentration of phosphorus, calcium, magnesium, silicon, and aluminum after FO treatment*

| <i>Constituent</i> | <i>Concentration (mg/L)</i> |
|--------------------|-----------------------------|
| <i>Phosphate</i>   | <i>224.8</i>                |
| <i>Calcium</i>     | <i>84.6</i>                 |
| <i>Magnesium</i>   | <i>14.2</i>                 |
| <i>Silicon</i>     | <i>24.6</i>                 |
| <i>Aluminium</i>   | <i>18.4</i>                 |
